# Supplementary material for: SINBAD, structural, experimental and clinical characterization of STAT inhibitors and their potential applications
Source: PubMed Central journal article supplement (PMC8971479; doi:10.1038/s41597-022-01243-3), 2022-03-31
Supplement: 41597_2022_1243_MOESM1_ESM.pdf [file 41597_2022_1243_MOESM1_ESM.pdf]

# 3,3 diindolylmethane

a.

| Name               | Value                              |
|--------------------|------------------------------------|
| Weight             | 246.313 g/mol                      |
| Zinc ID            | ZINC187911                         |
| Smiles             | c1ccc2c(Cc3c[nH]c4cccc34)c[nH]c2c1 |
| Molecular formula  | C17H14N2                           |
| Mode of inhibition | N/A                                |

b.

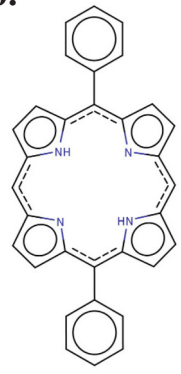

## Clinical Trials

Show 10 entries

c.

| Study title                                                                                | Status         | Conditions                                | Link        |
|--------------------------------------------------------------------------------------------|----------------|-------------------------------------------|-------------|
| 3,3-Diindolylmethane in Patients With Systemic Lupus Erythematosus                         | Terminated     | SLE                                       | NCT02483624 |
| A Nutritional Intervention to Decrease Breast Density Among Female BRCA (BRCA1/2) Carriers | Unknown status | BRCA1 Gene Mutation   BRCA2 Gene Mutation | NCT02197000 |
| Diindolylmethane in Healthy Volunteers                                                     | Completed      | Healthy, no Evidence of Disease           | NCT00392652 |

## Visualization

d.

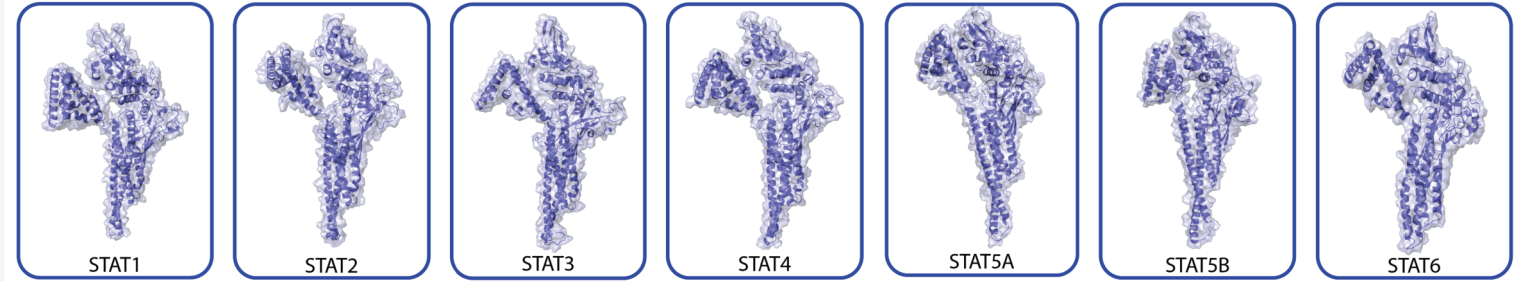

## References

Show 10 entries

e.

| Publication                                                                                                                                                                                                                                                                                                               | DOI                          | Pubmed                                       | PMCID      |
|---------------------------------------------------------------------------------------------------------------------------------------------------------------------------------------------------------------------------------------------------------------------------------------------------------------------------|------------------------------|----------------------------------------------|------------|
| 3,3-Diindolylmethane suppresses vascular smooth muscle cell phenotypic modulation and inhibits neointima formation after carotid injury. <i>PLoS one</i> Hongjing Guan, Lihua Zhu, Mingyue Fu, Da Yang, Song Tian, Yuanyan Guo, Changping Cui, Lang Wang, Hong Jiang, 7-4, None, 2012-04-10; 10.1371/journal.pone.0034957 | 10.1371/journal.pone.0034957 | 22506059                                     | PMC3323601 |
| Diindolylmethane suppresses ovarian cancer growth and potentiates the effect of cisplatin in tumor mouse model by targeting signal transducer and activator of transcription 3 (STAT3). <i>BMC medicine</i> Prabhoo K Kandala, Sanjay K Srivastava, 10, None, 2012-01-26; 2012-01-26; 10.1186/1741-7015-10-9.             | 10.1186/1741-7015-10-9.      | 22280969                                     | PMC3298725 |
| Inhibition of STAT Signalling in Bladder Cancer by Diindolylmethane - Relevance to Cell Adhesion, Migration and Proliferation                                                                                                                                                                                             | N/A                          | N/A                                          | N/A        |
| Regulation of Janus-activated Kinase-2 (JAK2) by diindolylmethane in ovarian cancer in vitro and in vivo                                                                                                                                                                                                                  | 10.5582/dot.2012.v6.2.94     | https://www.ncbi.nlm.nih.gov/pubmed/22622019 | N/A        |

Showing 1 to 4 of 4 entries

Previous 1 Next

## Vendors

f.

| Company                   | Lnk to product                                                                                     |
|---------------------------|----------------------------------------------------------------------------------------------------|
| Caymanchemical            | https://www.caymanchem.com/product/16090/59k2C15-dpp                                               |
| MERCK (Sigma Aldrich)     | https://www.sigmaaldrich.com/catalog/product/mm/573109?lang=pl&region=PL                           |
| Sanata Cruz Biotechnology | https://www.scbt.com/p/stat3-inhibitor-viii-5-15-dpp-22112-89-6                                    |
| Abcam                     | https://www.abcam.com/515-dpp-stat3-inhibitor-viii-stat3-inhibitor-ab146023.html                   |
| ClinSciSciences           | https://www.clinisciences.com/autres-produits-186/stat3-inhibitor-viii-5-15-dpp-22112-1279971.html |

## Filter data

g.

|                  |                                                                                                                                                                                                                                                                                                                                                                                                                                                                                                                                                                                                          |
|------------------|----------------------------------------------------------------------------------------------------------------------------------------------------------------------------------------------------------------------------------------------------------------------------------------------------------------------------------------------------------------------------------------------------------------------------------------------------------------------------------------------------------------------------------------------------------------------------------------------------------|
| Compound         | 3,3 diindolylmethane                                                                                                                                                                                                                                                                                                                                                                                                                                                                                                                                                                                     |
| Experiment types | Aortic ring assay, BrdU cell proliferation assay, Caspase 3/7 activity, Cell Migration Assay, Collagen adhesion assay, ELISA, E2-TFA transcription factor colorimetric assay, Flow cytometry, Flow cytometry- annexin V binding and propidium iodide staining, Immunofluorescence, Immunohistochemical staining, Immunohistochemistry, Luciferase activity, Mice weight, SRB cell survival assay, TUNEL, Transwell Boyden Chamber; Hema Gurr rapid stain (BDH), Trypan blue dye exclusion assay, Tumor volume, WST-1, Western Blot, Wound healing assay, annexin V binding and propidium iodide staining |
| Concentrations   | 1.00, 10.00, 100.00, 120.00, 150.00, 20.00, 25.00, 3.00, 40.00, 5.00, 50.00, 60.00, 75.00, 80.00                                                                                                                                                                                                                                                                                                                                                                                                                                                                                                         |
| Cell lines       | A2780, HUVECS, J82, NOSE, OVCAR-3, OVCAR-429, OVCAR-433, RT112, RT4, SKOV-3, SKOV-3 (xenograft), SKOV-3 (xenografts), TOV-21G, V5MC, carotid artery tissue, rat thoracic aorta                                                                                                                                                                                                                                                                                                                                                                                                                           |
| Organisms        | Homo sapiens, Mus musculus, Rattus norvegicus                                                                                                                                                                                                                                                                                                                                                                                                                                                                                                                                                            |
| Animal models    | Cr1NU(NCr)-Foxn1nu, athymic nude mice, c57BL/6                                                                                                                                                                                                                                                                                                                                                                                                                                                                                                                                                           |
| STAT proteins    | PARP, STAT1, STAT1 (cytoplasm), STAT1 (nucleus), STAT3, STAT3 (cytoplasm), STAT3 (nucleus), STAT5A, STAT5B, p-STAT1 (Y701), p-STAT1 (cytoplasm), p-STAT1 (nucleus), p-STAT3 (S727), p-STAT3 (Y705), p-STAT3 (Y705) (nucleus), p-STAT3 (cytoplasm), p-STAT3 (nucleus), p-STAT3(Y705)                                                                                                                                                                                                                                                                                                                      |
| Other            | Actin, Akt473, CD31, CD45, CDK4, CDK6, Cdc25C, Cdk1/Cdc2, Cdk6, Cleaved Caspase 3, Cleaved Caspase-3, Cleaved PARP, Cyclin B1, Cyclin D1, Desmin, ERK, GAPDH, GSK3B, HIF-1a, IL-6, Lamin B (nucleus), Mcl-1, PDGFR, PK1, SM alpha-actin, SM22, Survivin, VEGF, actin, lamin (cytoplasm), lamin (nucleus), p-Akt473, p-ERK, p-GSK3B, p-JAK2 (Y1007), p-PDGFR, p-cofilin, p27Kip1                                                                                                                                                                                                                          |

## Experiments

Show 10 entries

h.

| Compound             | Experiment type | Concentration | Cell line | Organism     | Animal model | Stat protein | Details |
|----------------------|-----------------|---------------|-----------|--------------|--------------|--------------|---------|
| 3,3 diindolylmethane | Western Blot    | 25.00 µM      | SKOV-3    | Homo sapiens |              |              |         |
| 3,3 diindolylmethane | Western Blot    | 50.00 µM      | SKOV-3    | Homo sapiens |              |              |         |
| 3,3 diindolylmethane | Western Blot    | 75.00 µM      | SKOV-3    | Homo sapiens |              |              |         |
| 3,3 diindolylmethane | Western Blot    | 25.00 µM      | NOSE      | Homo sapiens |              |              |         |

**Supplementary Figure 1. Exemplary page presenting data about STAT inhibitory compound in SINBAD.**

**A.** Summary table with basic data regarding name, formula, molecular weight and way compound interacts with STAT proteins. **B.** Presentation of molecules' structure. **C.** Searchable table with data regarding performed clinical trials (if available). It provides name of conducted study with its unique number, information about status and conditions of particular trial. **D.** For some compounds we provide visualization of their interaction with STAT-SH2 domain. Models published in PlosOne by Szelag et al. **E.** References with links to Pubmed and DOI numbers. **F.** Section providing quick links to potential vendor webpages. **G.** Table summarizing all conducted experiments and all conditions that were tested including cell lines, compound concentrations, animal models. STAT proteins and other possible targets. Each phrase is a functional link to more detailed information about particular conditions. **H.** Searchable table containing detailed information about all experiments conducted with usage of a particular compound.
